# Supplementary material for: Response strategies to acute and chronic environmental stress in the arctic breeding Lapland longspur (Calcarius lapponicus)
Source: Research Square preprint supplement (doi:10.21203/rs.3.rs-4565468/v1), 2024-09-09
Supplement: Supplementary file 1 [file a0353cf459199ea91ef597af.pdf]

# Supplementary Figures

Zhou Wu *et al.*

\*Corresponding author. Email: [zhou.wu@roslin.ed.ac.uk](mailto:zhou.wu@roslin.ed.ac.uk)

## Supplementary Figures

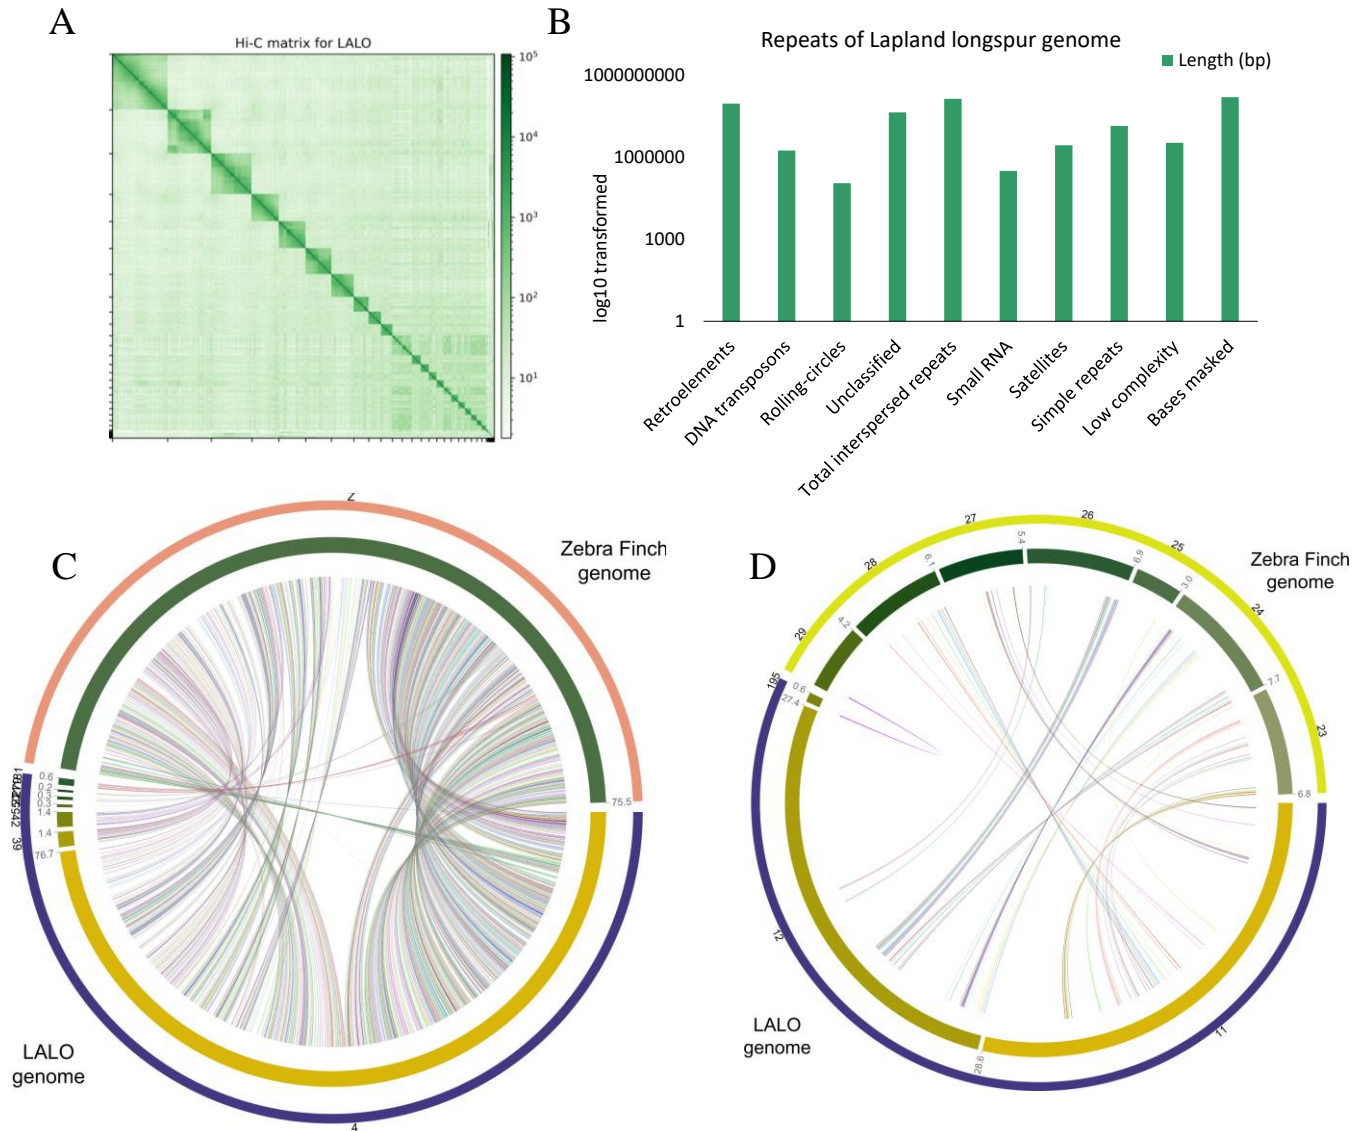

**Fig. S1. Genome assembly of Lapland longspur (*C. lapponicus*).** (A) The interaction matrix shows the Omni-C results for the genome assembly. (B) Repeat content of the Lapland longspur genome. The x axis denotes the repeat category, the y axis denotes the length of the repeat elements (log10 transformed). (C) Alignment between zebra finch chromosomes and Lapland longspur scaffolds for Z chromosome and (D) micro-chromosomes.

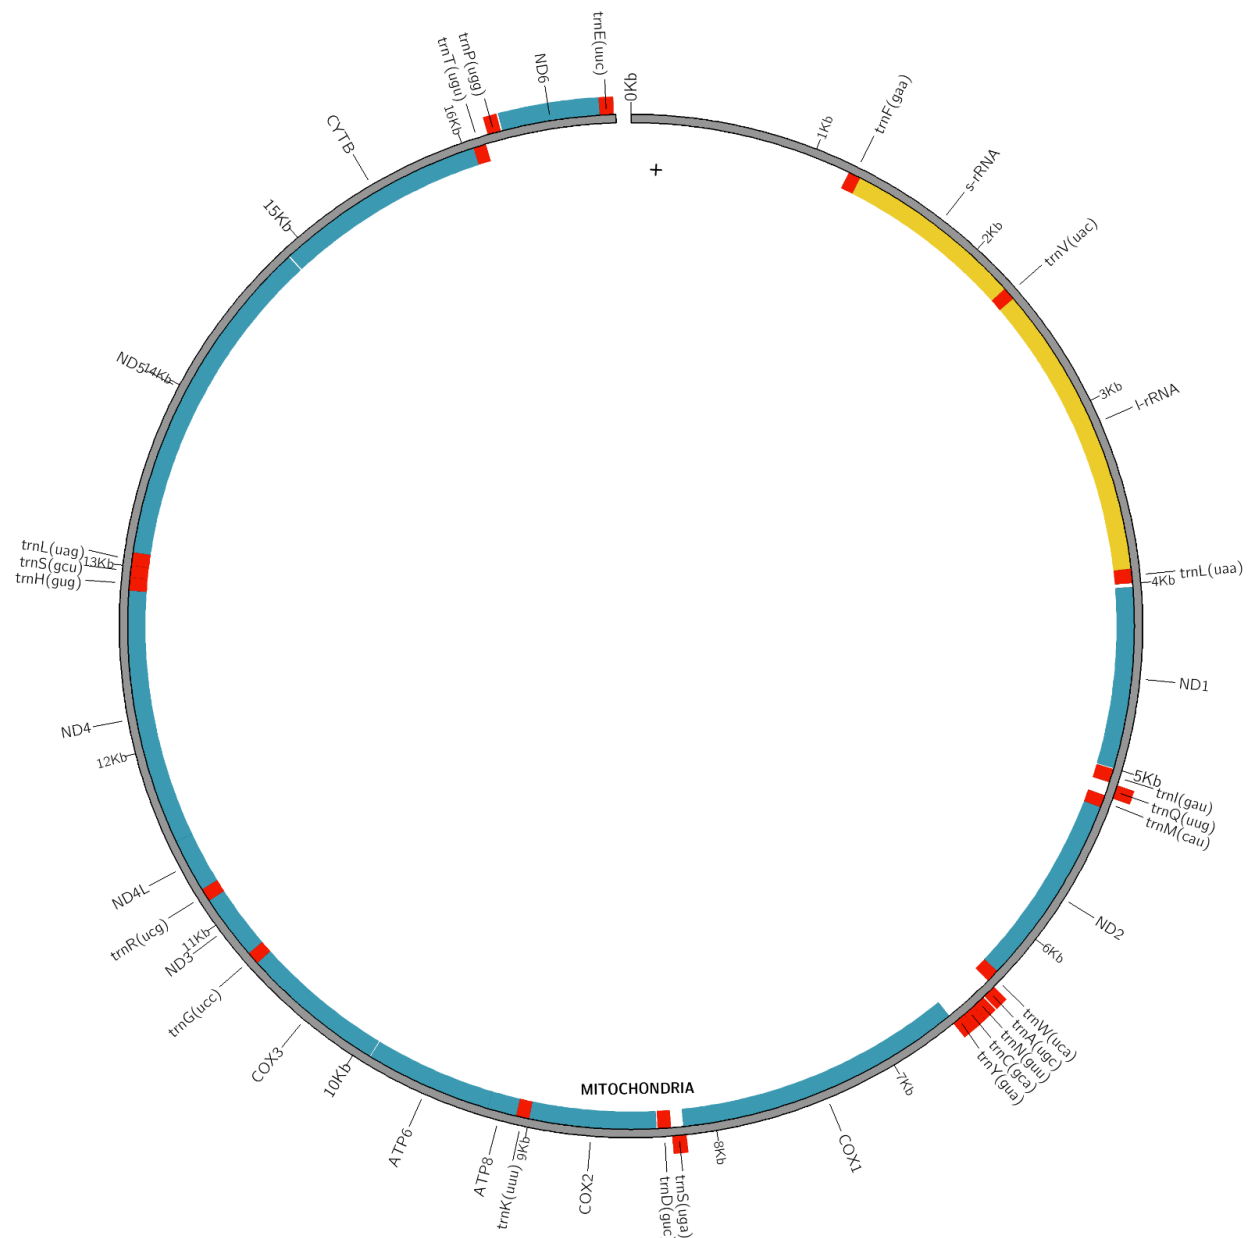

**Fig. S2. Mitochondrial genome and gene annotation of the Lapland longspur genome.**

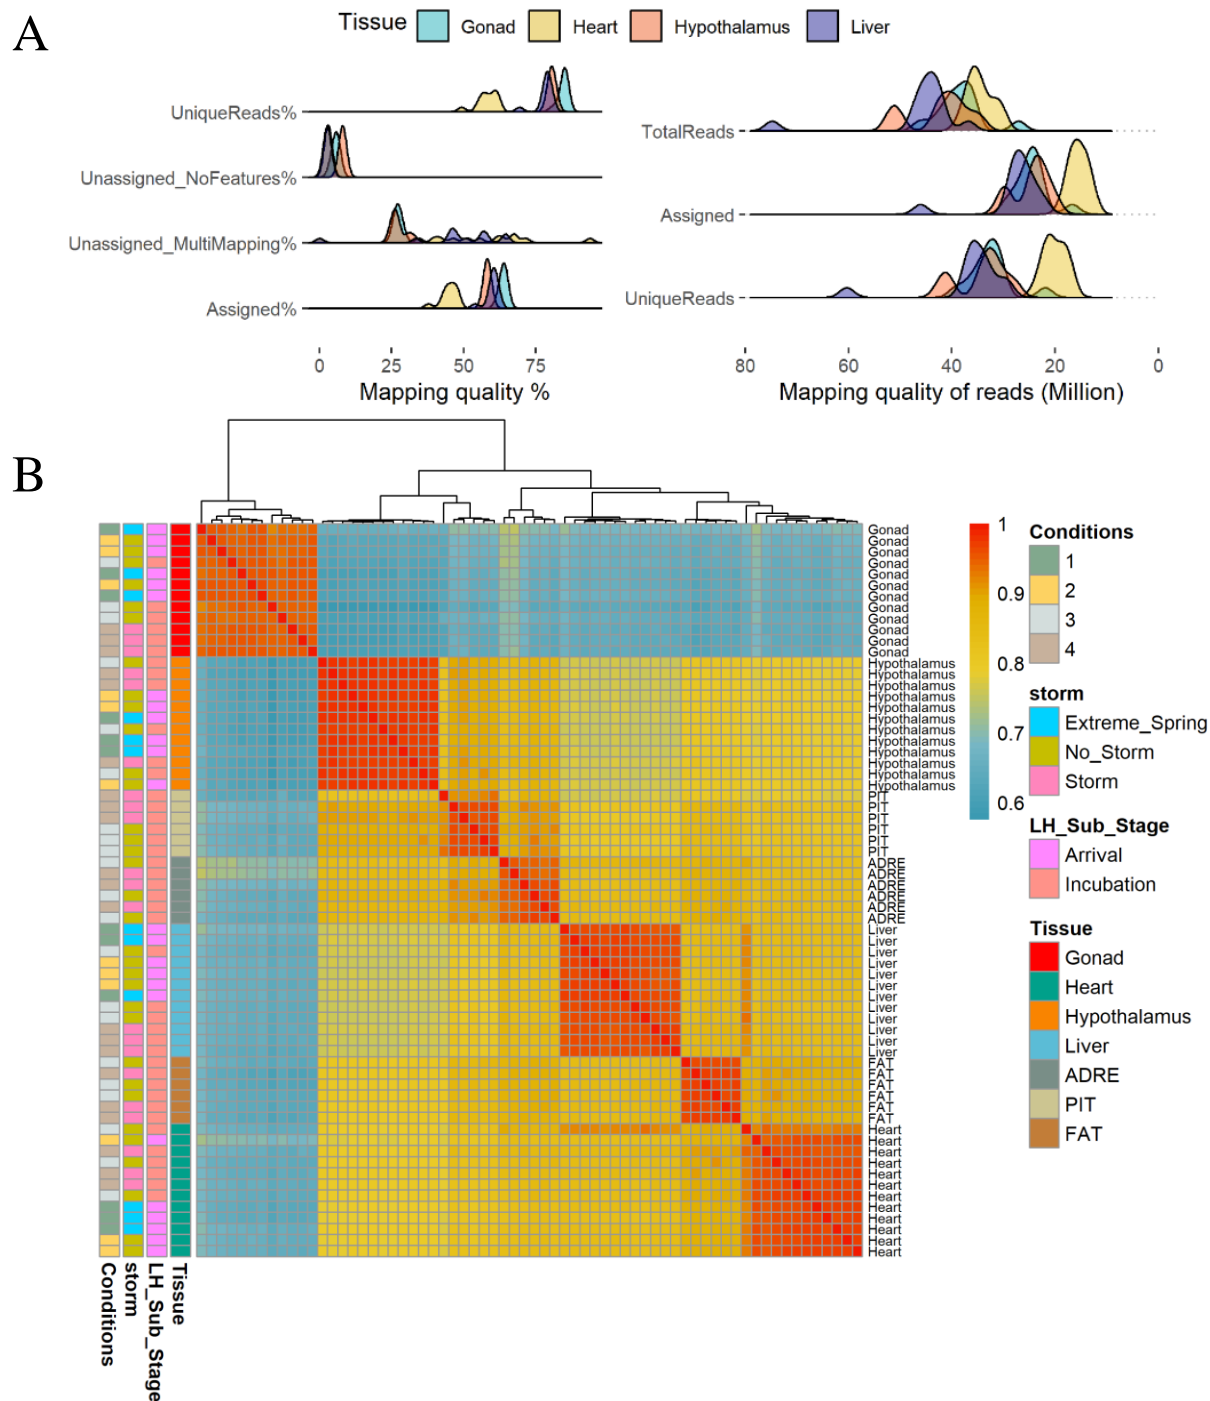

**Fig. S3. Expression profile of RNA-seq data.** (A) RNA mapping quality summarised by tissue. (B) Heatmap shows the correlation between all RNA-seq samples, demonstrating a tissue-specific pattern. The basic information for each sample is displayed on the right.

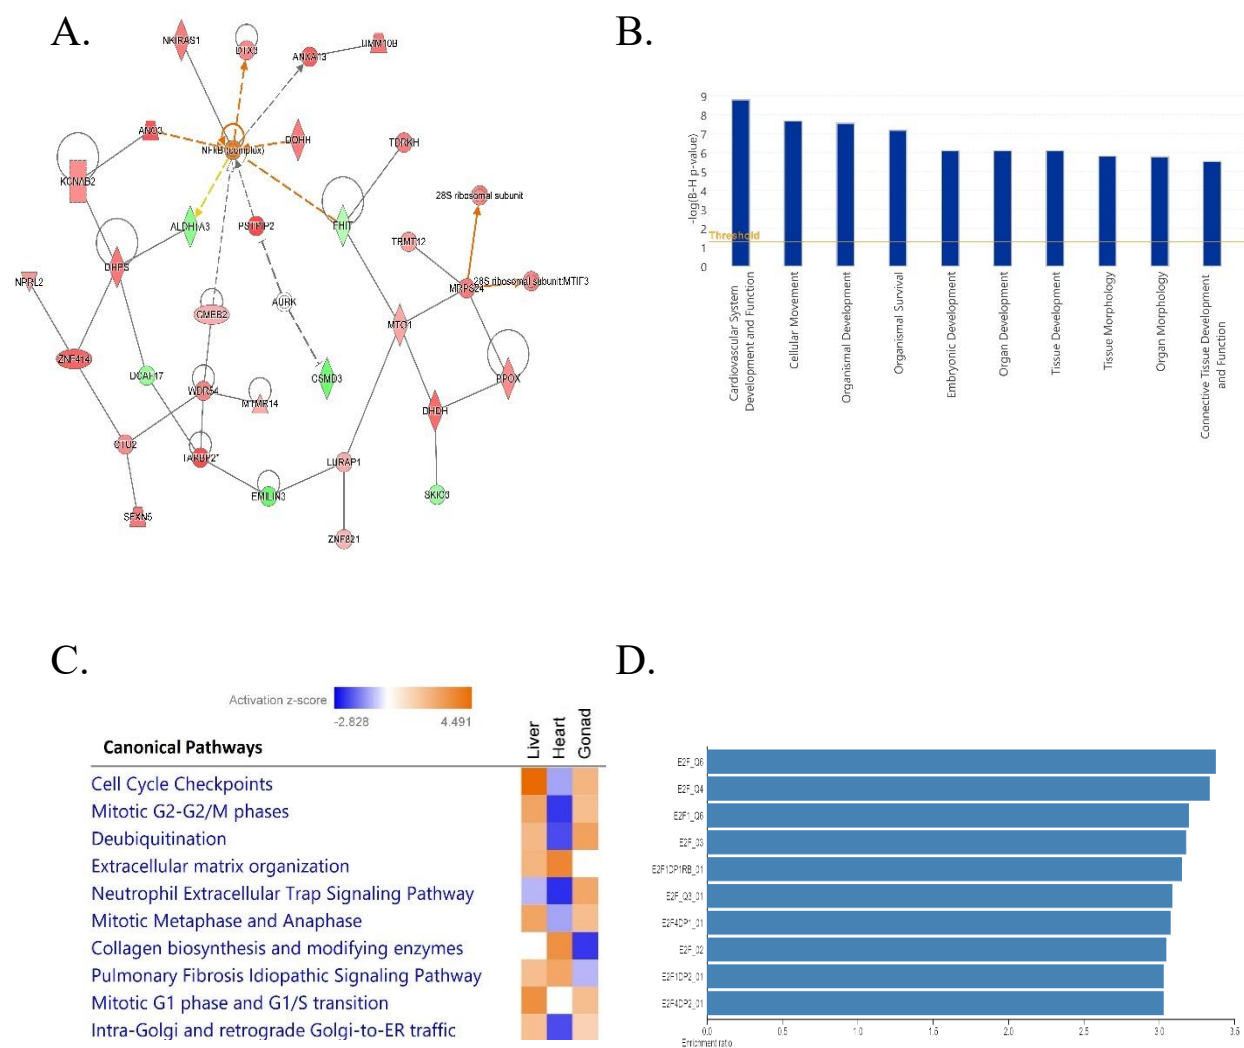

**Fig. S4. Enriched pathways, networks and transcription factor binding sites of genes differentially expressed under normal conditions. (A)** Significant network in gonad was identified using DEGs detected between benign life history stages (LHS). **(B)** Top 10 enriched molecular functions detected in heart (benign LHS). **(C)** Overview of significant canonical pathways across three tissues (benign LHS). **(D)** The significant transcription factor targets that are overrepresented in the liver (benign LHS).

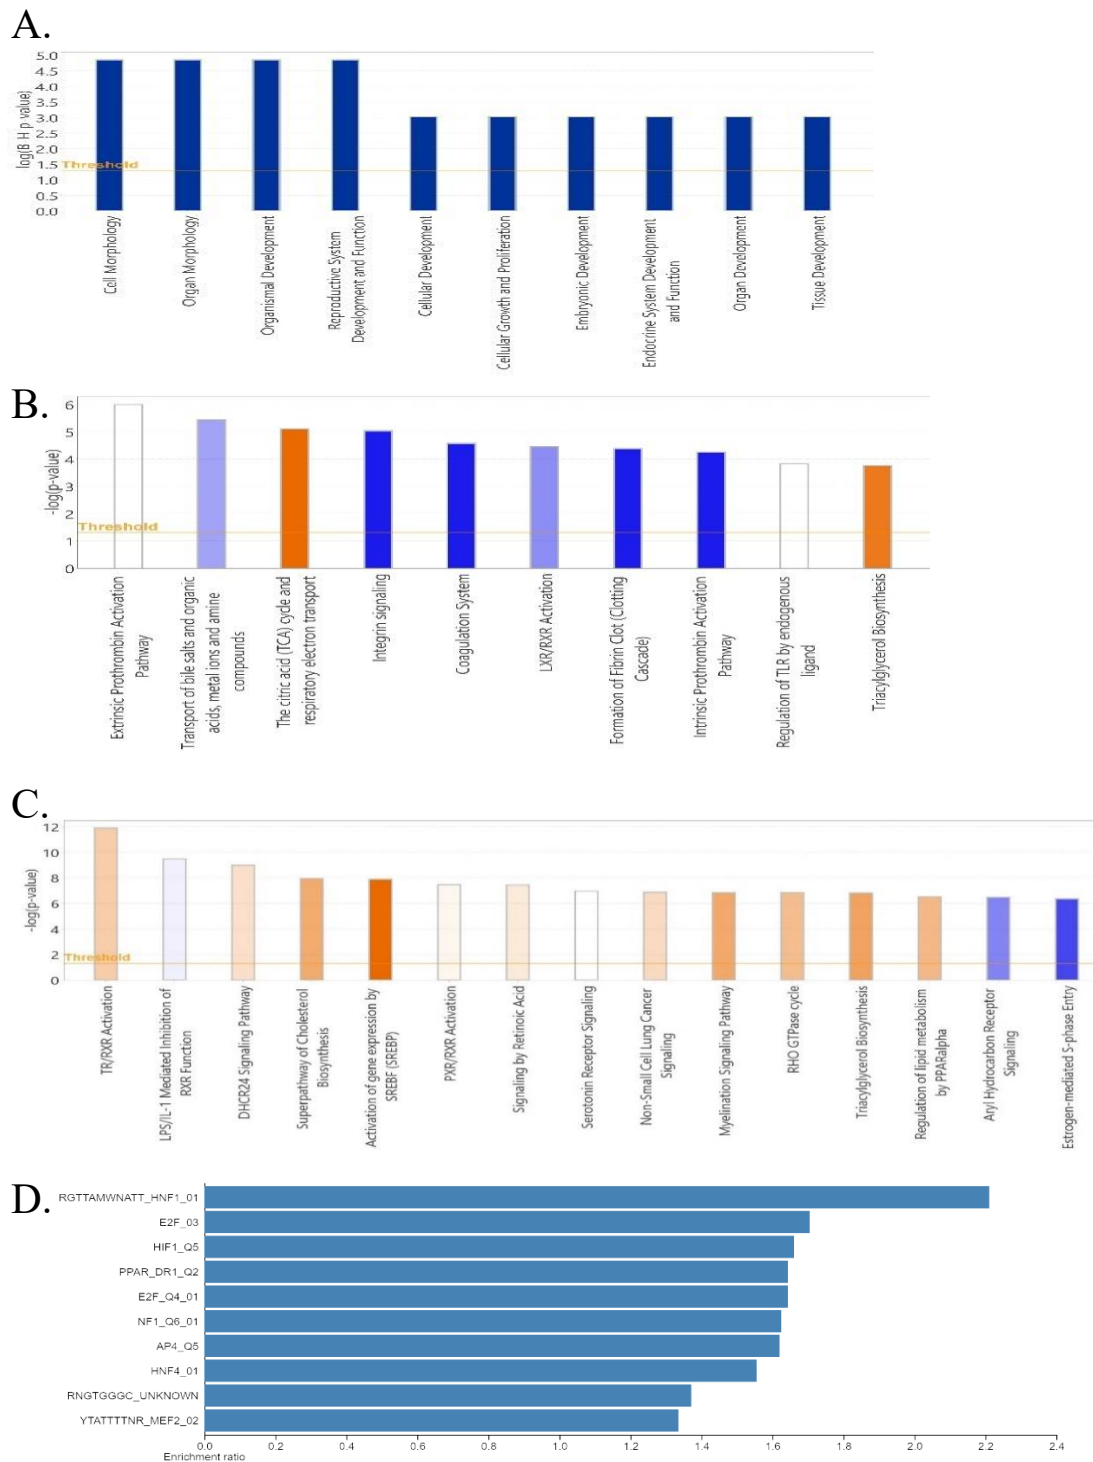

**Fig. S5. Enriched pathways and transcription factor binding sites of genes differentially expressed under extreme conditions. (A)** Top 10 molecular functions detected in gonad (extreme spring). **(B)** Most significant pathways detected in the liver (extreme spring). **(C)** Most significant pathways detected in liver (snowstorm). **(D)** The significant transcription factor targets that are overrepresented in liver (snowstorm).

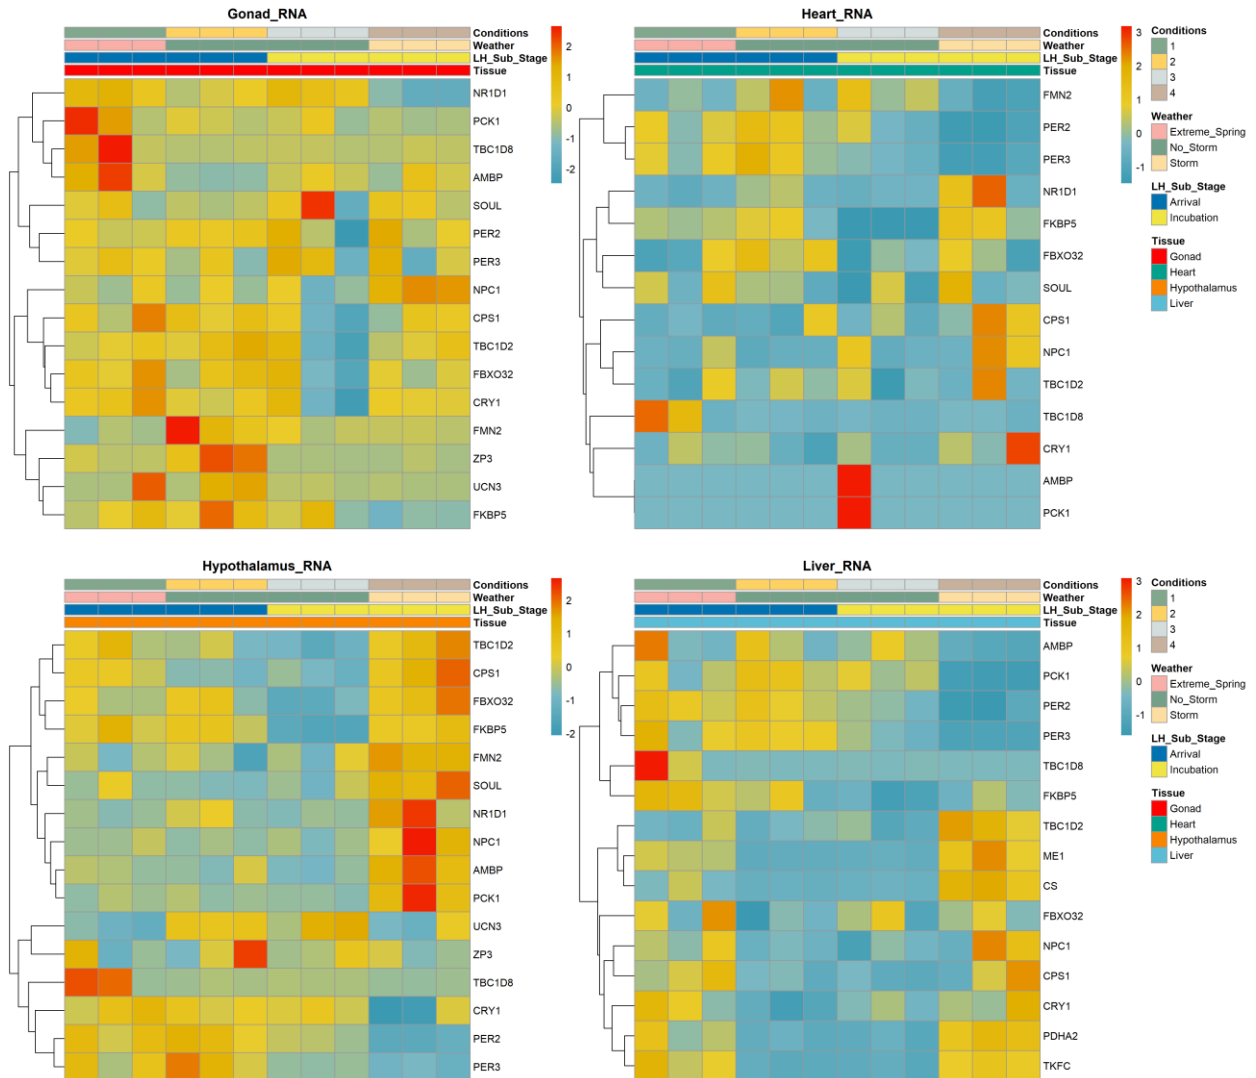

**Fig. S6. Expression of genes of interest in each of the four tissues tested in the two extreme weather events.**

Tissues are shown in the title of each grid, with each row showing a gene of interest, and each column showing an individual. The colour of the cell shows the relative expression level. The weather condition and the life-history stages of individuals are shown by colours at the top of each grid.

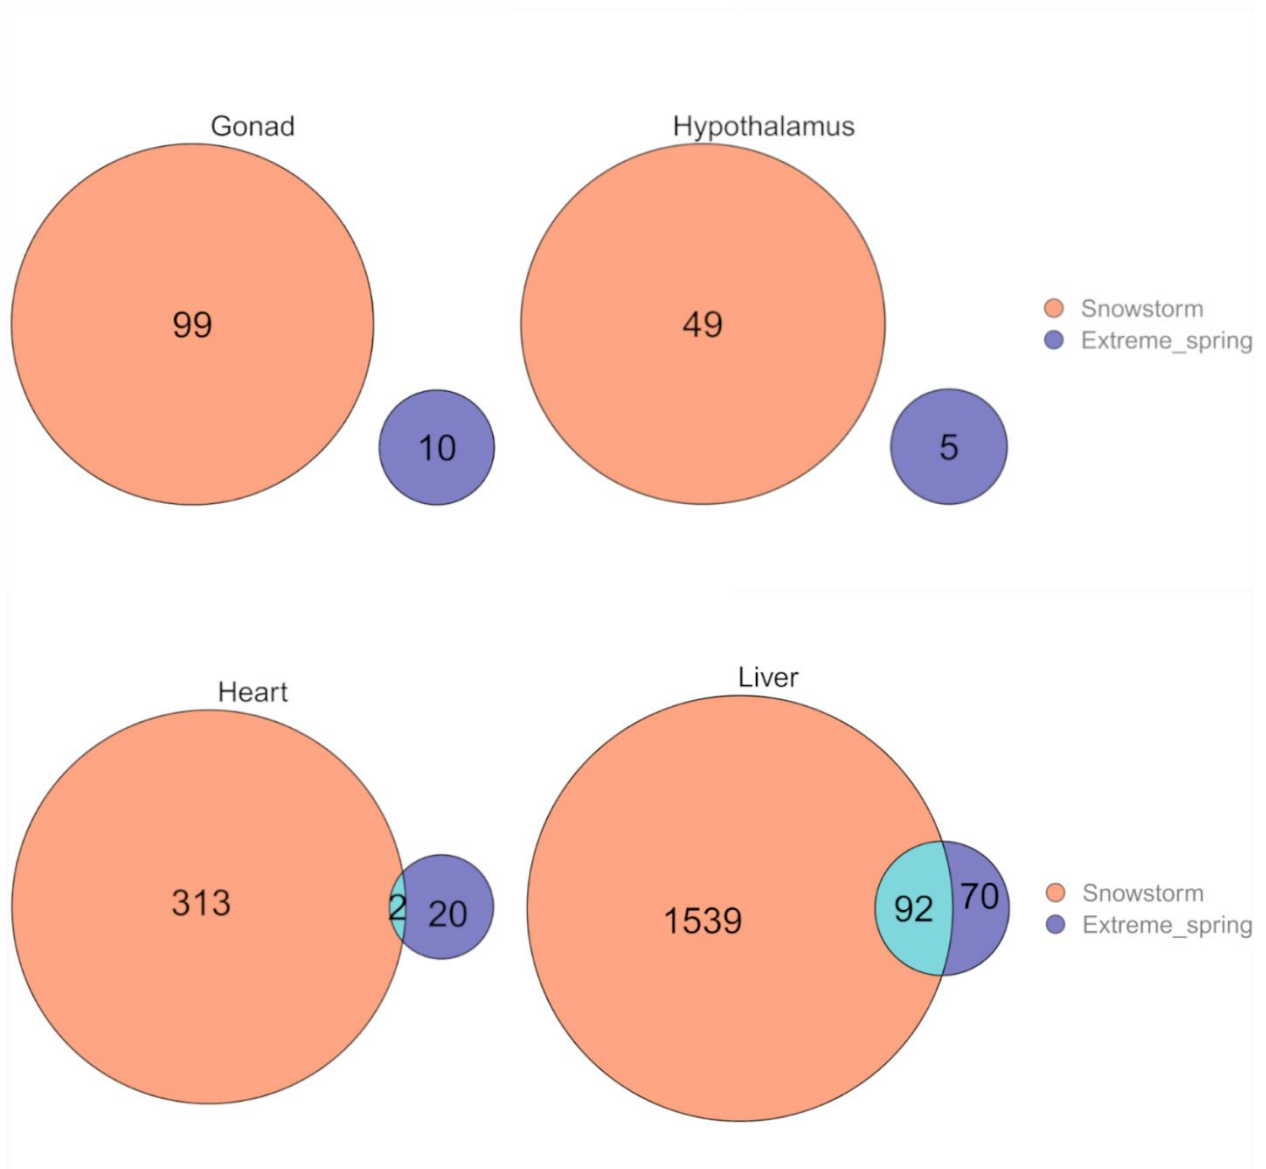

**Fig. S7. Comparison of the tissue-specific differentially expressed genes.**  
Venn diagrams show the DEGs between the two extreme weather conditions in each tissue.



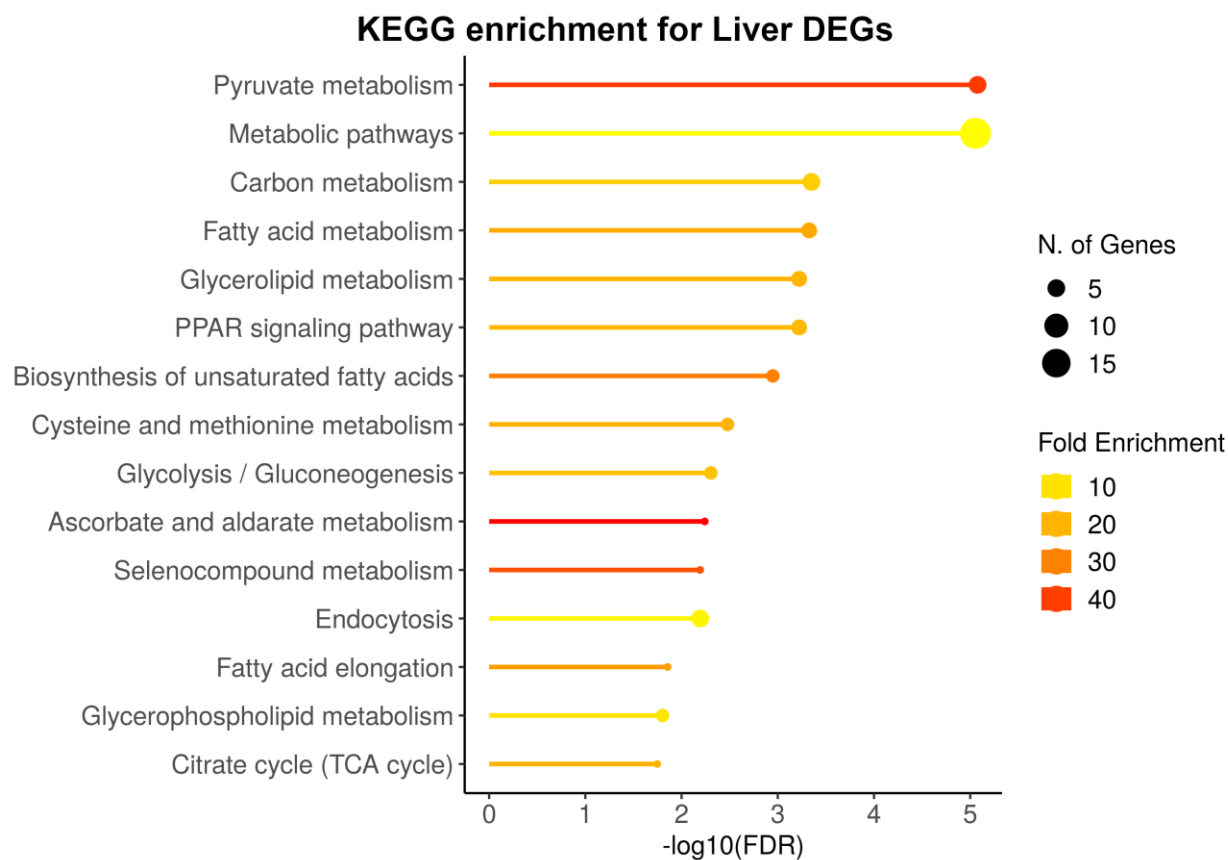

**Fig. S8. Function of Differentially Expressed Genes in liver.** KEGG pathway enrichment for liver DEGs that were identified in both extreme weather events (i.e., the extreme spring and the snowstorm).
