# Supplementary material for: Response strategies to acute and chronic environmental stress in the arctic breeding Lapland longspur (Calcarius lapponicus)
Source: Research Square preprint supplement (doi:10.21203/rs.3.rs-4565468/v1), 2024-09-09
Supplement: Supplementary file 2 [file b8830b1ac5f3bc3971879e3e.xlsx]

## Sheet: Sheet1
Table S1. Repeat content of Lapland longspur genome assembly.
Repeats	Count	Length (bp)	Percentage (%)
Retro-elements	233971	90082761	7.8
DNA transposons	7139	1739421	0.15
Rolling-circles	267	111322	0.01
Unclassified	66923	43335542	3.75
Total interspersed repeats		135157724	11.7
Small RNA	952	313698	0.03
Satellites	3981	2712556	0.23
Simple repeats	249465	13799903	1.19
Low complexity	51084	3330926	0.29
Bases masked		1,55,365,615	13.45
